# Supplementary material for: Pharmacologic characterization of SHR8443, a novel dual inhibitor of phosphatidylinositol 3-kinase and mammalian target of rapamycin
Source: PubMed Central journal article supplement (PMC5746119; doi:10.18632/oncotarget.22439), 2017-11-14
Supplement: oncotarget-08-107977-s001.pdf [file oncotarget-08-107977-s001.pdf]

## Pharmacologic characterization of SHR8443, a novel dual inhibitor of phosphatidylinositol 3-kinase and mammalian target of rapamycin

### SUPPLEMENTARY MATERIALS

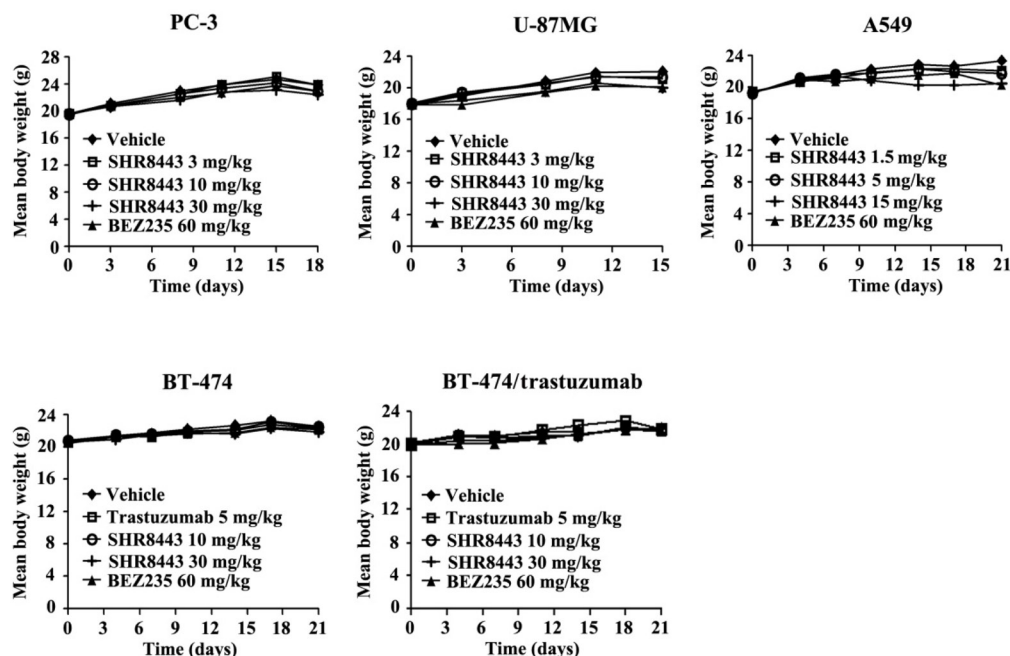

**Supplementary Figure 1: *In vivo* study of SHR8443 in mouse xenograft models.** U-87MG, PC-3, A549, BT-474 and BT-474/trastuzumab tumor-bearing mice were orally administered with BEZ235 or SHR8443 daily, or intravenously injected with trastuzumab twice a week. Body weight was determined twice a week.
